# Supplementary material for: Identification and Analysis of the Tegument Protein and Excretory-Secretory Products of the Carcinogenic Liver Fluke Clonorchis sinensis
Source: Front Microbiol. 2020 Sep 23;11:555730. doi: 10.3389/fmicb.2020.555730 (PMC7538622; doi:10.3389/fmicb.2020.555730)
Supplement: Supplementary Table 2 — The information of the identified tegument proteins. [file Table_2.XLSX]

## Sheet: Sheet1
Accession	Description	Subcellular Location	Score	Coverage	Proteins	Unique Peptides	# Peptides	PSMs	AAs	MW [kDa]	calc. pI
C7S309	Putative leucyl aminopeptidase	cytoskeleton	29.1964	42.58	3	10	16	19	519	56.0889	7.13721
G7Y3S9	Actin beta/gamma 1	cytoskeleton	24.421	49.87	6	4	13	20	391	43.9007	5.79541
G7Y748	Uncharacterized protein	cytoskeleton	23.7256	72.15	1	4	8	18	158	17.8228	6.01123
H2KTR3	Glutathione S-transferase omega-1	cytoskeleton	17.351	27.05	1	3	5	7	281	31.478	5.8208
H2KRJ2	Tubulin alpha (Fragment)	cytoskeleton	15.8558	33.7	6	6	9	10	451	50.1567	5.03369
H2KPA2	Actin beta/gamma 1	cytoskeleton	9.36072	32.75	6	2	9	13	345	38.4409	5.79541
H2KPF9	Annexin	cytoskeleton	6.97108	43.26	1	4	12	12	460	51.1272	6.22705
G7YAJ7	Tegument antigen	cytoskeleton	5.89156	54.29	1	3	6	9	175	20.5654	6.58057
G7YAJ9	Tegument antigen	cytoskeleton	5.39657	32.07	2	2	3	4	184	20.8123	4.41162
G7YQF3	Histidine ammonia-lyase	cytoskeleton	3.01484	21.13	1	1	8	30	705	77.5587	6.58057
H2KQR6	Chloride intracellular channel exc-4	cytoskeleton	1.71874	23.28	1	3	7	9	305	34.4292	4.99561
H2KPI5	Voltage-dependent anion channel protein 2	cytosol	92.0438	43.23	1	11	15	60	303	34.0248	9.40771
G7YHB9	Myoferlin (Fragment)	cytosol	47.0329	30.58	1	15	34	46	1684	193.816	5.71924
Q8T6J8	17 kDa myoglobin	cytosol	32.687	76.67	1	3	8	25	150	16.9276	5.19873
G7YHA8	Taurocyamine kinase	cytosol	31.3064	38.91	1	9	24	31	717	80.2239	7.84033
G7YD93	Fructose-bisphosphate aldolase	cytosol	30.3842	50.55	1	9	11	15	362	39.4903	7.72314
G7YUT9	Myoglobin	cytosol	29.9098	76	1	1	6	29	100	11.2477	6.30322
G7YGU2	Uncharacterized protein (Fragment)	cytosol	27.1287	61.11	1	4	4	12	126	14.1108	6.53662
G7YF68	Enolase	cytosol	26.1259	52.67	1	10	16	26	431	46.1665	6.87354
A1BNE5	Glutathione transferase	cytosol	25.3489	77.46	2	7	18	32	213	24.5064	5.35107
H2KP23	Fumarate hydratase class I (Fragment)	cytosol	22.6295	27.05	1	6	15	18	769	86.0997	8.93896
Q25595	Putative glutathione transferase	cytosol	22.049	41.28	2	6	7	15	218	25.0226	6.53662
H2KQ97	Phosphoenolpyruvate carboxykinase (GTP)	cytosol	20.9466	41.59	3	8	18	24	618	68.8669	7.86963
G7YHG7	Phosphoglycerate kinase	cytosol	20.2794	41.45	1	7	12	19	415	44.48	7.85498
G7YRK2	Probable dynein light chain	cytosol	19.8731	60.67	1	8	10	21	178	20.5741	8.646
G7YCZ4	Glycine dehydrogenase	cytosol	19.2037	27.76	1	4	13	20	526	57.4813	6.90283
G7YES7	Formiminoglutamase	cytosol	17.8146	53.39	1	5	10	14	339	37.1825	5.88428
Q5DM86	Cytosolic malate dehydrogenase	cytosol	17.6623	63.22	2	5	18	21	329	36.2608	8.45557
G7YW13	Dynein light chain	cytosol	16.9384	55.06	1	4	4	7	89	10.4862	6.68311
G7YIA6	Branched-chain amino acid aminotransferase	cytosol	16.5427	63.85	1	2	8	12	130	15.0447	7.50342
H2KPE2	Glyceraldehyde-3-phosphate dehydrogenase	cytosol	15.5042	62.31	1	8	14	16	337	36.3744	7.57666
G7YIE7	Heat shock 70kDa protein 1/8 (Fragment)	cytosol	15.3105	28.8	5	2	15	16	573	62.6198	7.21045
G7YNS8	Molecular chaperone DnaK	cytosol	13.6363	32.63	1	6	22	25	714	78.0112	6.96143
H2KV24	Glucose-6-phosphate isomerase (Fragment)	cytosol	13.3721	23.24	1	4	9	13	581	64.799	6.90283
H2KR99	Dynein light chain LC8-type	cytosol	12.7765	30.34	1	3	4	7	89	10.2881	6.91748
G7YIE9	Heat shock cognate 71 kDa protein	cytosol	12.1516	33.72	1	2	10	12	347	38.1575	6.46826
G7YF88	Tubulin alpha	cytosol	11.4911	28.26	1	3	16	22	828	92.1157	6.7417
H2KSW9	Dihydrolipoamide dehydrogenase (Fragment)	cytosol	11.2125	38.01	1	3	10	29	271	29.1025	6.34131
G7YCD3	Cytochrome-b5 reductase (Fragment)	cytosol	11.0313	27.2	1	3	5	9	250	28.1233	8.45557
G7Y5H4	Actin-interacting protein 1	cytosol	10.6835	31.13	1	4	15	19	755	82.6106	8.03076
G7Y6U9	Annexin	cytosol	10.5638	29.8	1	4	8	10	349	38.8096	5.30029
E2JF28	Thioredoxin peroxidase	cytosol	10.3978	37.95	3	1	6	10	195	21.9261	7.09326
H2KUT1	NADH dehydrogenase (Ubiquinone) Fe-S protein 1	cytosol	10.0996	16.01	1	4	8	10	662	72.6311	6.59521
B1WA65	Elongation factor 1-alpha	cytosol	10.0503	16.27	1	4	6	8	461	50.2732	8.99756
G7Y9X9	Retinal dehydrogenase 1	cytosol	9.99766	27.25	1	5	10	13	488	52.6031	6.354
G7Y7Z7	Fatty acid-binding protein	cytosol	9.74171	47.17	1	3	5	7	106	12.3121	6.53662
H2KQI2	Urocanate hydratase	cytosol	9.2899	22.32	1	2	11	14	663	73.317	7.1958
G7YD87	Aspartate aminotransferase	cytosol	9.25125	31.25	1	4	9	13	400	44.2654	8.41162
G7Y2I9	Molecular chaperone HtpG	cytosol	9.17136	32.49	1	3	16	17	714	81.7683	5.10986
G7YLP4	Adenosine deaminase	cytosol	9.0321	26.62	1	3	5	5	293	32.5755	5.2876
G7Y8S7	Mitochondrial trans-2-enoyl-CoA reductase	cytosol	8.73874	20.16	1	2	12	15	754	83.5771	9.27588
H2KP66	Electron transfer flavoprotein beta subunit	cytosol	8.67056	42.75	1	2	6	6	138	15.152	5.99854
G7YNI5	1-pyrroline-5-carboxylate dehydrogenase	cytosol	8.48738	13.36	1	4	7	9	883	97.8507	8.82178
G7Y784	Glutathione S-transferase	cytosol	7.55536	45.16	1	4	8	9	186	21.209	5.89697
G7Y466	Tegument antigen	cytosol	7.46975	31.52	1	5	7	10	184	21.6755	5.70654
G7Y691	Citrate synthase	cytosol	6.99121	30.08	1	5	10	15	399	44.4907	7.54736
H2KPM6	Annexin A7	cytosol	6.89586	37.13	1	5	11	23	342	38.8507	7.03467
G7Y6J8	Spectrin alpha	cytosol	6.47653	27.59	1	1	44	50	2160	249.331	5.21143
H2KPA7	DnaJ homolog subfamily A member 1	cytosol	6.32009	19.11	1	1	6	7	403	45.1427	7.00537
H2KPZ5	Calponin	cytosol	6.31648	39.89	1	2	9	10	361	39.6166	9.02686
H2KSL0	Elongation factor 2	cytosol	6.0034	27.84	1	3	16	18	855	94.916	6.50732
H2KPP1	Phosphate carrier protein mitochondrial	cytosol	5.8406	36.04	1	5	16	19	530	58.9645	9.21729
G7Y5V3	4-hydroxybutyrate coenzyme A transferase	cytosol	5.81616	15.42	1	2	3	4	253	27.198	6.34131
H2KNU1	Tegument antigen	cytosol	5.65638	43.08	1	4	7	10	195	22.638	4.85596
B2KYF7	Tegumental calcium-binding EF-hand protein (Fragment)	cytosol	5.55448	62.38	1	1	9	10	202	23.7317	5.18604
H2KNF5	Tyrosine 3-monooxygenase/tryptophan 5-monooxygenase activation protein	cytosol	5.50993	29.13	1	5	8	8	309	35.1823	5.37646
G7Y935	Succinyl-CoA synthetase alpha subunit	cytosol	5.27818	10.23	1	1	3	5	342	36.4217	8.35303
H2KTQ5	Radixin	cytosol	5.19712	36.32	1	2	7	8	212	25.1747	5.021
G7YA24	Uridine phosphorylase	cytosol	5.05388	13.95	1	2	3	3	301	33.1147	6.62451
H2KQA9	Tubulin beta	cytosol	5.049	36.66	1	3	11	16	431	48.9257	5.36377
B5G4X6	Disulfide-isomerase ER-60 (Fragment)	cytosol	4.86604	27.27	2	2	6	7	286	32.3594	7.54736
G7YD16	Uncharacterized protein	cytosol	4.86519	29.44	1	3	5	5	197	22.3214	8.01611
G7YJX9	Succinate dehydrogenase (Ubiquinone) iron-sulfur protein	cytosol	4.76631	20.18	1	4	8	11	446	50.6797	8.08936
T2B419	Cs22.1 antigen protein (Fragment)	cytosol	4.74293	87.57	2	1	3	4	515	52.7812	4.27197
O97096	28 kDa glutathione S-transferase	cytosol	4.54698	51.89	2	3	10	12	212	24.6605	8.35303
G7YUI1	Coproporphyrinogen III oxidase	cytosol	4.47724	30.5	1	1	5	6	259	30.354	6.17627
G7YNU0	Plastin-2	cytosol	4.39957	18.98	1	3	12	12	648	73.2358	6.50732
G7YL48	6-phosphogluconate dehydrogenase	cytosol	4.34736	28.4	1	3	6	9	243	26.8569	9.34912
G7YIH4	Uncharacterized protein	cytosol	4.30306	33.04	1	2	5	7	115	12.8697	9.36377
G7YWS1	Rho GDP-dissociation inhibitor	cytosol	4.22538	14.08	1	1	5	7	476	53.3054	6.68311
G7YW38	Enoyl-CoA hydratase / long-chain 3-hydroxyacyl-CoA dehydrogenase (Fragment)	cytosol	4.10404	20.93	1	1	13	15	707	77.1231	8.73389
H2KQN2	Severin	cytosol	4.10217	34.36	1	2	11	12	358	40.8635	5.38916
H2KQ58	Transgelin	cytosol	3.99483	11.26	1	2	2	2	222	24.8746	7.97217
G7YAR4	Thioredoxin 1	cytosol	3.94121	29.9	1	1	3	3	204	23.1209	7.6499
H2KS75	S-phase kinase-associated protein 1	cytosol	3.92752	39.86	2	1	3	3	138	16.0538	4.55127
G7YD28	3-oxoacid CoA-transferase	cytosol	3.85507	19.81	1	2	6	6	414	45.1362	6.40479
G7YCM3	NADH dehydrogenase (Ubiquinone) 1 alpha subcomplex 12 (Fragment)	cytosol	3.74804	53.62	1	3	6	6	138	16.5383	9.08545
G7YP32	Uncharacterized protein	cytosol	3.63748	14.29	1	2	21	24	2344	266.075	6.20166
H2KQI7	Methylglutaconyl-CoA hydratase	cytosol	3.50499	27.66	1	1	5	5	329	35.7479	8.41162
H2KQR8	Mitochondrial import receptor subunit TOM40	cytosol	3.47827	26.56	1	1	6	7	320	35.238	9.14404
H2KV34	Glyoxalase domain-containing protein 4	cytosol	3.43301	18.18	1	1	3	3	286	32.2338	5.40186
G7YGL2	Prostaglandin-H2 D-isomerase	cytosol	3.38544	32.38	1	1	5	7	210	23.6703	7.41553
G7Y4K3	Voltage-dependent anion channel protein 2 (Fragment)	cytosol	3.32939	27.85	1	1	6	6	316	35.0387	8.11865
G7Y5C3	Aminomethyltransferase	cytosol	3.26998	27.54	1	1	10	14	483	53.1324	8.80713
H2KQK7	Na(+)/H(+) exchange regulatory cofactor NHE-RF2	cytosol	3.24734	31.07	1	1	4	7	177	19.6431	5.94775
G7YAS3	Phospholipid scramblase 2	cytosol	3.23228	7.91	1	1	2	4	316	34.5825	6.93213
G7YFV6	Uncharacterized protein	cytosol	3.21539	34.04	1	3	4	4	94	11.389	9.87646
G7YXH9	Uncharacterized protein	cytosol	3.18269	49.67	1	1	6	9	151	18.0221	5.18604
G7YGJ8	Aldehyde dehydrogenase (NAD+)	cytosol	3.1532	34.18	1	1	5	10	237	26.4168	5.97314
G7YE60	Dynein light chain LC8-type	cytosol	3.14399	8.39	1	1	1	2	143	15.9578	5.63037
H2KPF1	Dynein light chain LC8-type	cytosol	3.03303	44.94	1	1	2	2	89	10.209	6.03662
G7YL14	Major vault protein (Fragment)	cytosol	3.01867	22.13	1	1	2	2	235	26.7767	6.37939
H2KSX3	NADH dehydrogenase (Ubiquinone) flavoprotein 1	cytosol	2.7828	20.64	1	1	6	7	373	41.0744	6.771
H2KSV7	Aminoacylase-1	cytosol	2.75697	15.58	1	1	6	6	430	48.2024	6.0874
H2KVB2	Tegument antigen	cytosol	2.70553	37.31	1	1	5	12	201	23.7457	6.55127
G7YSR8	Peptidyl-prolyl cis-trans isomerase	cytosol	2.69938	56.08	1	1	7	7	148	16.0648	7.81104
G7YLT3	Hydroxyacylglutathione hydrolase	cytosol	2.65788	32.09	1	2	7	8	268	29.581	7.34229
G7YG47	Mitochondrial fission 1 protein	cytosol	2.64332	46.05	1	1	5	5	152	17.0669	8.90967
H2KQM1	Glucosamine-6-phosphate isomerase	cytosol	2.51764	16.79	1	1	2	2	268	30.1864	6.31592
G7Y2J3	Transketolase	cytosol	2.48372	10.17	1	1	3	3	629	68.4311	7.34229
H2KP50	Omega-amidase NIT2	cytosol	2.46262	14.73	1	1	4	4	292	32.3926	7.03467
G7Y5W3	Tegument antigen	cytosol	2.45514	42.44	1	2	6	7	172	20.9074	5.36377
H2KUA8	Leukocyte elastase inhibitor	cytosol	2.20622	20.41	1	3	6	6	387	43.0691	7.09326
G7Y5Z1	Cystathionine gamma-lyase	cytosol	2.15843	28.67	1	3	8	9	415	46.2515	6.43018
F1ASZ6	Peptidyl-prolyl cis-trans isomerase	cytosol	2.02679	42.59	1	2	6	8	162	17.5427	8.44092
G7YFX6	Ras-related protein Rab-2A	cytosol	1.95475	61.54	1	1	8	10	195	22.1471	6.29053
H2KPI2	Synaptotagmin-2	cytosol	1.91532	12.14	1	1	6	6	379	42.263	7.66455
G7Y5W2	Dynein light chain 1 cytoplasmic	cytosol	1.84797	20.62	1	1	2	2	97	11.6146	5.8335
G7YXL1	Radixin (Fragment)	cytosol	1.73259	30.06	1	1	3	3	173	20.0351	5.38916
G7YVB2	Tegument antigen	cytosol	1.70495	38.66	2	1	6	6	194	22.53	5.26221
H2KVA5	Calnexin (Fragment)	cytosol	1.68783	17.31	1	1	2	2	156	17.645	7.10791
H2KRM5	Tubulin polymerization-promoting protein family member 2	cytosol	1.6403	31.95	1	1	4	5	169	18.4774	8.74854
G7Y6P7	Dynein light chain LC8-type	cytosol	1.63148	54.02	1	1	3	6	87	9.90082	8.1333
H2KR18	Basigin (Fragment)	cytosol	1.62624	22.2	1	1	8	8	545	60.7801	6.48096
H2KT41	Uncharacterized protein	cytosol	1.61138	4.76	1	1	2	5	504	55.431	6.97607
G7YW14	Dynein light chain 1 cytoplasmic	cytosol	0	26.4	1	1	4	5	125	14.1292	8.32373
G7Y2Y9	Dynein heavy chain axonemal	cytosol	0	20.24	1	1	61	88	4747	543.69	5.93506
G7YDF9	Triosephosphate isomerase	cytosol	0	25.76	1	1	7	10	229	25.253	8.93896
H2KUR4	Ornithine--oxo-acid transaminase	cytosol	0	47.09	1	1	9	12	361	39.5514	6.90283
G7YX75	Probable inorganic pyrophosphatase 1 (Fragment)	cytosol	0	32.38	1	1	17	33	667	75.4995	8.1626
G7YWY4	Probable ADP-dependent glucokinase	cytosol	0	19.67	1	1	8	13	478	52.1071	6.66846
G7Y363	Methylmalonyl-CoA epimerase	cytosol	0	25.74	1	1	2	6	101	10.9976	6.04932
H2KTW4	Alpha-actinin sarcomeric (Fragment)	cytosol	0	25.14	1	1	15	22	871	100.073	6.69775
H2KUE1	Chloride intracellular channel exc-4	cytosol	0	16.57	1	1	4	5	338	38.4779	7.29834
G7YIA3	Peptidyl-prolyl cis-trans isomerase-like 2	cytosol	0	14.99	1	1	8	10	907	104.391	7.62061
G7Y3V9	DnaJ homolog subfamily B member 4	cytosol	0	41.11	1	1	10	11	343	37.8884	9.17334
H2KSS7	Oligosaccharyltransferase complex subunit delta	cytosol	0	13.39	1	1	4	6	575	62.5597	9.05615
G7YU58	Tropomyosin-2	cytosol	0	16.09	1	1	4	4	348	40.3475	5.10986
H2KUK0	Saposin	cytosol	0	25.7	1	1	5	5	284	32.0445	5.14795
G7YS39	Fatty-acid amide hydrolase 1	cytosol	0	17.72	1	1	6	7	553	60.4997	7.81104
G7Y6X2	Kelch-like protein 2/3	cytosol	0	22.35	1	1	8	9	671	74.0231	6.31592
G7YMK0	Pyruvate dehydrogenase E2 component (Dihydrolipoamide acetyltransferase)	cytosol, mitochondria	2.25494	31.53	1	2	11	13	463	48.8417	8.23584
G7YFT8	Fatty acid-binding protein type 3	cytosol, nuclear	56.5488	65.48	1	5	5	24	84	9.51082	5.89697
F2VT71	Tegumental protein	cytosol, nuclear	29.3196	75.14	2	6	13	21	181	21.1326	4.729
G7YIC0	Heat shock 70kDa protein 1/8	cytosol, nuclear	12.6673	36.97	1	1	12	13	403	44.6841	7.51807
G7YR42	Uncharacterized protein (Fragment)	cytosol, nuclear	11.5526	49.17	1	5	9	10	240	27.5879	5.59229
G7YK68	Fatty-acid amide hydrolase 1	cytosol, nuclear	10.5058	23.25	1	1	10	14	873	95.0922	8.60205
G7YR21	Otoferlin (Fragment)	cytosol, nuclear	10.0361	27.39	1	4	33	41	1855	213.048	6.46826
G7Y882	Brain protein 44	cytosol, nuclear	8.55637	54.42	1	1	7	11	215	23.9785	9.75928
G7YTA1	Phosphoglucomutase-1	cytosol, nuclear	6.02966	24.73	1	2	10	12	744	81.793	7.34229
G7YK00	Uncharacterized protein	cytosol, nuclear	5.65101	67.62	1	2	6	10	105	11.9369	7.02002
G7Y7Z1	Endoplasmin (Fragment)	cytosol, nuclear	5.58258	10.89	1	1	14	20	1662	187.951	4.65283
G7YDR3	Endophilin-A3	cytosol, nuclear	5.21206	28.68	1	3	9	16	387	43.5487	5.8335
H2KV59	Transgelin	cytosol, nuclear	4.51526	45.26	1	2	6	9	190	21.136	8.49951
G7YGY3	Alanine aminotransferase 1	cytosol, nuclear	4.38455	17.4	1	1	5	5	431	47.5358	7.15186
G7YGS4	Uncharacterized protein	cytosol, nuclear	4.26259	13.58	1	1	9	11	670	74.5412	6.34131
H6WAQ3	Paramyosin	cytosol, nuclear	3.50604	42.13	2	1	30	41	864	99.3858	5.45264
G7YLS5	3-hydroxyacyl-CoA dehydrogenase / 3-hydroxy-2-methylbutyryl-CoA dehydrogenase	cytosol, nuclear	3.30708	19.7	1	1	1	1	132	14.0383	5.8208
G7YP55	Wiskott-Aldrich syndrome protein family member 1	cytosol, nuclear	2.67375	17.08	1	1	3	7	445	47.6706	7.76709
G7YEY0	Sugar nucleotide epimerase related K07071	cytosol, nuclear	2.30324	14.14	1	1	4	4	290	32.428	8.35303
G7YNC9	Delta-aminolevulinic acid dehydratase	cytosol, nuclear	2.1751	27.05	1	1	9	12	488	53.5566	7.02002
G7YG49	Titin	cytosol, nuclear	2.14666	20.29	1	1	8	12	759	83.3464	4.77979
H2KPH5	Uncharacterized protein	cytosol, nuclear	0	15	1	1	4	4	280	30.5537	6.11279
G7YM96	Sorting and assembly machinery component 50 homolog A (Fragment)	cytosol, nuclear	0	18.1	1	2	9	12	779	87.4911	7.28369
G7YS40	Fatty-acid amide hydrolase 1	endoplasmic reticulum	6.58545	13.1	1	2	6	10	626	70.2445	8.03076
G7YN43	Basement membrane-specific heparan sulfate proteoglycan core protein	endoplasmic reticulum, Golgi apparatus	3.03065	14.41	1	1	59	64	6814	755.208	5.19873
A1L048	Prohibitin	endoplasmic reticulum, mitochondria	1.61385	27.44	2	1	5	6	277	30.5282	5.71924
G7YUI4	Four and a half LIM domains protein 2	extracellular	22.9321	23.08	1	6	9	11	533	60.8829	7.89893
Q8MXC3	Putative uncharacterized protein	extracellular	19.2646	25.56	1	3	4	9	90	10.3846	8.90967
E9KZF4	PPMP I antigen Cs34 (Fragment)	extracellular	14.7781	79.25	2	2	2	7	265	28.3458	7.34229
G7YC77	Aconitate hydratase, mitochondrial	extracellular	14.7186	24.46	1	3	13	15	744	80.2558	7.43018
G7YHN5	Acetyl-CoA C-acetyltransferase	extracellular	13.3933	20.07	1	3	5	8	284	30.2083	5.88428
H2KPW2	Cathepsin B-like cysteine proteinase	extracellular	12.7975	24.21	2	3	6	9	347	38.6484	5.77002
G7YGH4	Uncharacterized protein	extracellular	12.6458	28.21	1	2	3	7	156	17.0692	7.40088
K7NB00	Calreticulin	extracellular	12.0955	27.23	2	2	6	8	415	48.1293	4.7417
B5G4X4	Cysteine protease preprotein	extracellular	11.6536	24.85	16	4	6	9	326	36.534	5.36377
G7Y700	Uncharacterized protein	extracellular	9.19186	50	1	4	4	6	84	9.31522	6.82959
G7YNX5	Uncharacterized protein	extracellular	8.26905	39.19	1	3	4	5	74	8.3192	4.94482
Q8MUB9	Calcium binding protein	extracellular	7.06901	100	2	4	8	9	70	7.74079	4.66553
H2KPW5	Uncharacterized protein	extracellular	6.79077	29.41	1	2	2	2	153	17.1156	6.31592
G7YEP6	Ester hydrolase C11orf54 homolog	extracellular	6.77258	29.6	1	2	4	5	250	27.2418	6.7124
G7YA95	Isochorismatase domain-containing protein 2 mitochondrial	extracellular	6.55053	39.61	1	1	5	6	207	22.4687	7.40088
H2KV16	Natterin-4	extracellular	5.74568	30.77	1	1	2	3	156	16.5679	6.3667
G7YKQ7	Metallo-beta-lactamase domain-containing protein 1	extracellular	5.43354	28.51	1	2	5	8	235	25.7556	4.85596
G7YUH6	Uncharacterized protein	extracellular	4.95411	66.92	1	4	6	22	130	14.2959	6.53662
G7YIG6	Protein CutA	extracellular	4.84396	49.69	1	1	5	7	161	17.9222	5.26221
G7YE79	Dynein light chain LC8-type	extracellular	3.94877	34.38	1	1	1	1	96	11.077	4.7417
G7YQ49	Large subunit ribosomal protein L40e	extracellular	3.90834	58.59	4	3	7	9	128	14.695	9.83252
G7YW11	Dynein light chain LC8-type	extracellular	3.49295	28.13	1	1	2	2	96	11.0034	7.78174
G7Y8E4	F-type H+-transporting ATPase subunit delta	extracellular	3.0769	20.54	1	1	3	4	185	20.7454	5.021
G7YWP3	60S ribosomal protein L19	extracellular	2.76308	18.29	1	1	9	10	607	68.213	7.62061
G7Y6P5	Dynein light chain LC8-type	extracellular	2.74016	49.44	1	1	3	3	89	10.5791	7.69385
G7YN65	Dihydropteridine reductase	extracellular	2.52	12.07	1	1	2	2	174	18.8696	8.27979
G7Y6M0	Cysteine rich protein 61	extracellular	2.49564	18.81	1	1	5	7	404	45.2053	7.7085
G7YUV3	Ras-related protein Rab-11A	extracellular	2.39112	11.45	1	1	2	2	227	25.3086	8.93896
H2KUW2	2-oxoisovalerate dehydrogenase E1 component beta subunit	extracellular	2.28977	11.23	1	1	2	2	285	31.022	5.79541
G7YM78	Superoxide dismutase [Cu-Zn]	extracellular	2.19662	17.11	3	1	2	3	152	15.5307	6.23975
G7YWU9	Protein ETHE1 mitochondrial	extracellular	2.12757	13.58	1	1	4	4	243	26.8877	6.84424
G7YT75	Uncharacterized protein	extracellular	2.10742	32.86	1	1	5	5	140	15.0597	8.63135
G7YG05	Ran-binding protein 10	extracellular	2.07898	14.74	1	1	7	7	916	99.7096	7.28369
B5G4Y2	Aspartic protease	extracellular	2.03544	11.06	3	1	3	3	425	46.5546	7.32764
G7Y9L4	Granulins	extracellular	1.8594	9.71	1	1	1	1	103	11.1281	7.94287
A1YLF2	Cathepsin B-like cysteine proteinase	extracellular	1.83452	25.66	1	2	7	7	343	38.5525	6.63916
G7Y799	Protein-tyrosine sulfotransferase	extracellular	1.61946	30.68	1	1	8	8	365	42.4375	9.71533
G7YMD6	Glycerol-3-phosphate dehydrogenase	extracellular	0	30.26	1	1	14	15	737	82.0208	8.74854
H2KTS6	Low-density lipoprotein receptor-related protein 1B	extracellular	0	9.87	1	1	6	8	922	100.253	5.23682
G7YCV4	Clonorporin 1	extracellular	0	35.06	2	1	4	6	174	19.894	6.13818
G7YSQ5	Cytochrome b5 type B	extracellular	0	32.59	1	1	2	2	135	15.5614	5.12256
G7Y819	Mitochondrial glutamate carrier 1	extracellular	0	16.95	1	1	7	7	472	51.6696	8.82178
G7YLC0	Glutamate dehydrogenase (NAD(P)+)	mitochondria	42.2293	49.18	2	15	23	30	551	61.0742	8.45557
G7YS59	Pyruvate carboxylase (Fragment)	mitochondria	42.2189	46.98	1	16	21	31	464	51.4228	7.60596
G7YW97	Propionyl-CoA carboxylase alpha chain	mitochondria	32.5277	42.54	1	11	22	25	764	84.2176	6.50732
G7Y663	Mitochondrial-processing peptidase subunit beta	mitochondria	30.7792	35.02	2	9	14	19	474	53.0552	6.37939
G7YQG7	Succinate dehydrogenase [ubiquinone] flavoprotein subunit, mitochondrial	mitochondria	29.6585	28.73	1	11	15	17	651	71.4205	7.43018
H2KU96	ATP synthase subunit beta (Fragment)	mitochondria	23.9973	32.29	1	7	11	16	477	51.1278	5.73193
G7Y880	Cytochrome b-c1 complex subunit 2 mitochondrial	mitochondria	20.6674	22.89	1	8	14	18	498	53.6858	9.01221
G7Y9X8	Retinal dehydrogenase 1	mitochondria	19.6183	48.57	1	6	13	18	488	52.4888	5.8208
H2KSC8	ATP synthase subunit alpha (Fragment)	mitochondria	17.6457	28.02	1	8	13	17	546	59.8133	7.75244
G7Y4Q2	Pyruvate dehydrogenase E1 component subunit beta	mitochondria	15.9822	31	1	3	5	7	271	28.9676	5.78271
H2KNR5	Pyruvate dehydrogenase E1 component subunit alpha	mitochondria	13.8335	26.56	1	5	8	8	369	41.3814	7.82568
G7YIM9	Succinyl-CoA ligase subunit beta	mitochondria	13.1854	29.52	1	4	8	16	437	47.3954	6.53662
Q6Q2Z4	Superoxide dismutase	mitochondria	12.6553	28.7	2	3	4	6	230	25.3591	8.90967
G7YJN6	Malate dehydrogenase	mitochondria	12.3868	40.89	1	3	7	9	225	24.2321	7.89893
G7YFK3	Propionyl-CoA carboxylase beta chain	mitochondria	11.9409	41.5	1	7	16	20	535	58.8999	7.32764
G7YJS5	Electron transfer flavoprotein alpha subunit	mitochondria	11.8181	24.63	2	3	5	5	337	35.3478	6.69775
H2KSP8	MICOS complex subunit MIC60	mitochondria	11.1179	30.05	1	4	16	22	772	86.6059	6.1001
G7Y4W9	Protein disulfide-isomerase (Fragment)	mitochondria	10.3838	34.45	1	2	10	16	508	56.6827	5.21143
G7YWM7	Malate dehydrogenase	mitochondria	10.0146	26.11	2	4	7	9	337	35.6226	8.23584
G7YSV2	Succinate dehydrogenase (Ubiquinone) membrane anchor subunit	mitochondria	9.73411	15.03	1	2	2	6	153	17.126	9.87646
G7YI57	Glycine dehydrogenase (Fragment)	mitochondria	9.38667	19.96	1	3	10	10	561	62.744	7.56201
G7YAY9	Proline dehydrogenase	mitochondria	9.21234	25.09	1	4	16	21	869	99.0615	8.95361
Q564A6	GTP:AMP phosphotransferase, mitochondrial	mitochondria	8.86567	58.77	2	4	10	12	228	26.0394	8.93896
G7YD70	Glutathione S-transferase (Fragment)	mitochondria	8.79412	50.24	1	3	8	11	205	23.5988	8.74854
H2KUA5	Microtubule-associated protein 1S	mitochondria	8.72446	7.33	1	3	10	10	2210	239.843	4.62744
G7YM44	Fructose-bisphosphate aldolase (Fragment)	mitochondria	8.53702	22.79	1	3	15	18	873	98.1212	9.62744
H2KSX2	Spectrin beta (Fragment)	mitochondria	8.28121	23.58	1	2	31	36	1925	222.689	5.23682
G7YJL5	Otoferlin	mitochondria	8.15961	39.07	1	1	3	4	151	17.1381	9.21729
H2KQN5	Legumain (Fragment)	mitochondria	8.04007	16.47	1	3	5	5	431	49.4546	6.771
G7YHR6	Isocitrate dehydrogenase [NADP]	mitochondria	7.54154	34.08	1	1	8	13	358	40.6555	8.73389
G7YGQ7	Alpha-aminoadipic semialdehyde synthase	mitochondria	7.38624	17.63	1	3	10	13	947	104.944	7.21045
G7YT72	Endophilin-B1	mitochondria	6.32108	49.76	1	1	7	12	209	23.6619	7.1665
G7Y3K2	2-oxoglutarate dehydrogenase E2 component	mitochondria	6.23268	30.73	1	3	10	12	436	47.7159	8.66064
A6YIE0	Cystatin-2	mitochondria	6.22486	50.81	2	1	3	5	124	13.7831	8.19189
H2KTC5	2-oxoglutarate dehydrogenase E1 component	mitochondria	6.16608	20.66	1	5	14	16	1002	113.28	6.91748
H2KRB2	Carboxymethylenebutenolidase homolog	mitochondria	5.14132	17.87	2	2	4	6	319	34.7285	8.86572
G7Y3P8	F-type H+-transporting ATPase subunit f	mitochondria	4.97346	29.95	1	2	5	5	217	25.0707	9.96436
Q1L2C7	Glutathione transferase	mitochondria	4.71315	54.25	2	1	9	10	212	24.3304	7.41553
G7YF67	Ubiquinol-cytochrome c reductase subunit 7	mitochondria	4.71268	23.08	1	1	5	8	130	15.4638	6.80029
G7YGC8	NADH dehydrogenase (Ubiquinone) Fe-S protein 8 (Fragment)	mitochondria	4.62343	23.23	1	1	2	5	198	22.3741	5.49072
G7YJD8	2 4-dienoyl-CoA reductase mitochondrial	mitochondria	4.41089	16.88	1	1	4	4	320	34.5731	9.33447
G7YDH1	Carbonyl reductase [NADPH] 1 (Fragment)	mitochondria	4.28557	18.34	1	2	4	6	289	32.9896	8.57275
G7YFL5	Cytochrome c oxidase subunit IV	mitochondria	4.00642	51.85	1	2	3	3	81	9.34563	9.01221
H2KUH6	Glycine amidinotransferase mitochondrial	mitochondria	3.92308	25.91	1	1	7	9	413	47.0548	7.07861
H2KQK0	Serine hydroxymethyltransferase (Fragment)	mitochondria	3.84976	19.3	1	2	6	6	487	53.5608	8.51416
G7YQ15	Cytochrome c oxidase subunit Va	mitochondria	3.70314	33.18	1	1	10	12	422	48.1719	9.51025
G0Z6T3	Peroxiredoxin (Alkyl hydroperoxide reductase subunit C)	mitochondria	3.48425	31.08	1	1	3	3	222	24.9121	8.646
H2KRI0	Tubulin beta	mitochondria	3.35027	27.54	1	1	8	10	483	54.1684	5.08447
G7Y635	Very long chain acyl-CoA dehydrogenase	mitochondria	3.14264	13.33	1	1	5	5	495	54.8041	6.68311
G7YR22	Methylmalonate-semialdehyde dehydrogenase	mitochondria	2.8327	19.3	1	2	4	4	456	49.1982	7.66455
G7YTD7	Calcineurin-like phosphoesterase domain-containing protein 1	mitochondria	2.78931	12.15	1	1	4	5	321	36.0224	6.22705
G7Y8E5	NADH dehydrogenase (Ubiquinone) 1 beta subcomplex 5 (Fragment)	mitochondria	2.7608	26.37	1	1	4	4	182	20.9477	7.84033
H2KNH0	3-methylcrotonyl-CoA carboxylase alpha subunit	mitochondria	2.39307	15.78	1	1	6	6	729	79.3251	6.44287
G7YX06	Hydroxysteroid dehydrogenase-like protein 2	mitochondria	2.30083	20.32	1	1	5	5	310	34.1052	6.78564
H2KRP2	NADH dehydrogenase (Ubiquinone) 1 alpha subcomplex 9	mitochondria	1.97741	24.81	1	1	7	7	395	45.0405	9.01221
A7XWR1	Leucine aminopeptidase (Fragment)	mitochondria	1.66235	17.81	3	1	5	5	393	42.4496	6.80029
G7YKP0	NADH dehydrogenase [ubiquinone] 1 alpha subcomplex subunit 10 mitochondrial	mitochondria	1.65896	20.65	1	2	7	9	494	57.0822	9.08545
B5G4W3	Mitochondrial ATP synthase B subunit	mitochondria	0	15.33	2	1	4	6	300	34.2979	8.95361
H2KVT9	NADH dehydrogenase [ubiquinone] iron-sulfur protein 4 mitochondrial	mitochondria	0	28.93	1	1	7	7	197	22.8646	9.46631
H2KVT6	NADH dehydrogenase [ubiquinone] 1 alpha subcomplex subunit 6	mitochondria	0	10.74	1	1	1	1	121	14.4737	9.65674
G7YV21	ES1 protein homolog mitochondrial	mitochondria	0	13.65	1	1	5	6	447	49.5941	7.85498
G7YP24	SEC23-interacting protein (Fragment)	mitochondria	0	13.58	1	1	6	11	773	85.7306	5.57959
H2KQH8	GrpE protein homolog	mitochondria	0	31.05	1	1	7	7	277	31.9714	8.35303
G7YHP4	Calpain	nuclear	66.2335	54.56	1	20	34	41	768	87.377	5.51611
G7YKJ4	Uncharacterized protein	nuclear	29.7636	20.47	1	8	49	62	4930	543.163	5.24951
G7Y7E2	Four and a half LIM domains protein 3	nuclear	20.0142	67.8	1	6	6	8	118	13.387	7.86963
G7YK67	Fatty-acid amide hydrolase 1	nuclear	14.5645	21.79	1	3	16	19	872	95.25	8.48486
H2KNL6	Golgi-associated plant pathogenesis-related protein 1	nuclear	11.1364	25.11	2	3	4	4	223	25.7439	9.23193
G7YNS2	Uncharacterized protein	nuclear	10.494	49	1	3	13	19	402	43.4934	5.97314
H2KTN7	Cysteine and glycine-rich protein	nuclear	9.82337	28.57	1	3	4	6	189	19.7613	8.45557
G7YD68	Uncharacterized protein (Fragment)	nuclear	7.70183	24.56	1	2	10	14	509	57.2911	8.73389
H2KQ80	Uncharacterized protein	nuclear	7.35134	40.37	1	4	11	13	322	37.1697	9.51025
H2KNZ3	14-3-3 epsilon	nuclear	5.27625	28.23	1	2	4	4	248	28.1603	5.03369
G7YDF5	Ubiquinone biosynthesis monooxygenase Coq6 (Fragment)	nuclear	5.12571	18.88	1	2	8	8	699	76.7876	8.57275
G7YAA0	Acetyl-CoA acyltransferase	nuclear	5.02079	17.68	1	1	10	11	724	80.2793	8.33838
G7YVN2	Histone H4	nuclear	4.99851	31.23	3	2	14	15	522	59.3802	9.80322
G7Y7F8	Diacylglycerol kinase	nuclear	4.97169	16.97	1	1	12	21	1002	109.841	6.26514
H2KRJ7	Myosin heavy chain	nuclear	4.6518	30.68	2	2	52	66	2076	238.048	5.80811
H2KNV1	Ubiquitin-conjugating enzyme E2 J1 (Fragment)	nuclear	4.58106	18.28	1	1	7	8	815	89.7561	7.10791
G7Y7A7	Uncharacterized protein	nuclear	4.43068	38.02	1	1	9	11	242	27.3649	5.16064
G7YS88	V-type H+-transporting ATPase subunit AC39	nuclear	4.16602	22.22	1	1	13	14	1026	115.189	6.68311
G7Y7U4	Tyrosine 3-monooxygenase/tryptophan 5-monooxygenase activation protein (Fragment)	nuclear	3.74436	26.16	1	2	18	21	1082	122.778	9.37842
G7YVX2	Mitochondrial import inner membrane translocase subunit TIM50	nuclear	3.33958	25.81	1	1	10	12	554	62.9611	8.49951
H2KRN4	Uncharacterized protein	nuclear	3.16852	21.45	1	3	19	25	1231	135.414	8.04541
H2KSJ1	Titin	nuclear	3.14069	6.34	1	1	5	5	899	99.1289	6.39209
H2KP26	Coronin	nuclear	3.06721	16.88	1	1	6	8	545	60.7844	6.1001
G7Y824	Dynein light chain LC8-type	nuclear	2.99454	63.11	1	1	5	7	103	12.0541	8.1626
G7Y2W2	Cat eye syndrome critical region protein 5	nuclear	2.80979	24.31	1	1	5	9	432	48.6809	6.41748
G7YEP3	DnaJ homolog subfamily B member 11	nuclear	2.35715	28.69	1	1	15	16	833	95.4323	8.32373
G7Y578	UPF0366 protein C11orf67 homolog	nuclear	2.27681	12.59	1	1	2	2	135	14.8725	5.47803
H2KUT2	Kinesin family member 4/7/21/27 (Fragment)	nuclear	2.24961	15.19	1	1	25	34	1982	218.549	6.771
H2KPX1	ETS domain-containing protein Elk-4	nuclear	2.13118	10.11	1	1	5	8	633	71.5991	8.27979
G7YQ75	Myosin-2	nuclear	2.08552	27.2	1	1	18	18	1147	132.456	5.94775
G7Y4A3	TNF receptor-associated protein 1	nuclear	2.05974	24.12	1	2	11	13	767	86.0906	6.23975
G7YHW9	Uncharacterized protein	nuclear	1.73327	16.13	1	1	22	23	2586	285.79	5.05908
G7Y4P5	TBC1 domain family member CG11727	nuclear	1.64421	23.15	1	1	10	11	877	98.886	5.45264
H2KQE7	Troponin T (Fragment)	nuclear	1.6053	31.71	1	1	12	12	410	48.6677	8.1626
G7YTI8	Uncharacterized protein	nuclear	0	6.69	1	1	1	1	314	33.971	4.39893
G7Y9I2	Leukotriene-A4 hydrolase	nuclear	0	14.71	1	1	7	10	612	70.0164	6.23975
G7YQW4	Protein polybromo-1	nuclear	0	15.68	1	1	21	31	2168	239.059	8.07471
H2KQ46	Tubulin alpha-2 chain	nuclear	0	11.55	1	1	9	10	1117	124.288	7.44482
G7YLY6	Uncharacterized protein	nuclear	0	7.45	1	1	4	5	765	86.2466	7.25439
G7YWG5	Tonsoku-like protein (Fragment)	nuclear	0	20.41	1	1	20	30	1627	179.148	8.38232
H2KTE8	2-hydroxyglutarate dehydrogenase	peroxisome	9.26135	31.59	1	2	12	15	497	54.9789	9.24658
G7YSL1	Lysosome-associated membrane glycoprotein	peroxisome	3.90926	29.1	1	1	4	4	244	27.1959	6.20166
G7Y2R2	Chaperone protein DnaJ	peroxisome	0	11.11	1	1	2	2	234	26.6895	7.59131
G7YK97	Cystathionine beta-synthase	plasma membrane	20.3444	14.49	1	4	20	25	1905	214.041	8.52881
G7YJ91	Ubiquinol-cytochrome c reductase cytochrome c1 subunit	plasma membrane	17.5399	29.7	1	5	6	10	303	33.5851	9.21729
H2KVG5	Sodium/potassium-transporting ATPase subunit alpha (Fragment)	plasma membrane	11.688	25.53	1	5	18	27	991	110.282	5.50342
G7Y5V4	Dynein heavy chain 10 axonemal	plasma membrane	10.8784	22.17	1	2	55	67	3830	438.465	6.34131
G7YHE0	ATP-binding cassette subfamily D (ALD) member 4	plasma membrane	8.81156	18.26	1	2	7	9	597	66.9511	5.98584
G7Y7C5	Filamin-C	plasma membrane	6.70195	16.77	1	3	24	31	2427	262.234	5.77002
H2KTC4	Kyphoscoliosis peptidase	plasma membrane	6.37785	27.09	1	6	16	20	875	96.942	5.92236
G7YKR0	NADH dehydrogenase (Ubiquinone) 1 beta subcomplex 11 (Fragment)	plasma membrane	5.75644	36.73	1	2	4	4	147	17.4801	6.21436
G7YAV6	Uncharacterized protein	plasma membrane	5.61157	16.05	1	1	64	82	6325	721.722	7.41553
H2KSG0	Glycerol kinase	plasma membrane	5.32398	12.98	1	2	7	9	601	65.1014	6.85889
G7YXC3	Solute carrier family 25 (Mitochondrial adenine nucleotide translocator) member 4/5/6/31	plasma membrane	4.85236	27.82	1	3	20	32	798	89.1366	9.21729
H2KTP9	Sodium/glucose cotransporter 1 (Fragment)	plasma membrane	4.77747	12.94	1	3	3	3	201	22.7937	7.07861
G7Y5W0	Filamin	plasma membrane	4.7084	9.57	1	2	17	20	2498	270.208	6.1001
G7YQ21	Carbohydrate kinase domain-containing protein	plasma membrane	4.27527	9.65	1	1	8	18	1451	161.074	6.771
H2KSW7	NADH dehydrogenase (Ubiquinone) Fe-S protein 2	plasma membrane	4.23551	39.57	1	2	14	19	609	69.3588	7.59131
G7YB65	Tetraspanin	plasma membrane	4.17753	23.51	1	2	10	15	536	59.207	8.36768
H2KTZ7	Acid sphingomyelinase-like phosphodiesterase 3a	plasma membrane	3.98892	27.51	1	3	12	13	498	56.5976	6.75635
A7XWR4	ADP/ATP carrier (Fragment)	plasma membrane	3.76562	30.46	1	3	6	7	151	16.3274	9.31982
G7YEE0	Succinate dehydrogenase (Ubiquinone) cytochrome b subunit	plasma membrane	3.52558	45.18	1	3	8	11	197	21.9775	9.84717
H2KTX9	Cytochrome c oxidase subunit XV assembly protein	plasma membrane	2.88975	27.34	1	1	6	7	384	42.9374	9.53955
G7YW63	Neurexin-1-alpha	plasma membrane	2.86908	21.07	1	2	15	17	949	104.329	6.81494
Q1M156	L-lactate dehydrogenase	plasma membrane	2.82847	18.29	2	1	4	10	328	35.6106	7.98682
H2KVD0	Sodium/glucose cotransporter 4	plasma membrane	2.44094	17.08	1	1	4	4	363	40.2554	7.60596
G7YHY2	Calcium uptake protein 1 mitochondrial	plasma membrane	2.29427	9.38	1	1	12	15	1973	212.844	6.88818
G7Y2S8	Anoctamin (Fragment)	plasma membrane	2.27015	20.05	1	1	31	34	1925	219.674	9.08545
H2KR16	Glutamate receptor delta-1 subunit (Fragment)	plasma membrane	1.95498	8.39	1	1	5	8	715	81.3574	8.77783
F2VT67	Surface membrane antigen	plasma membrane	1.8134	17.39	1	3	4	4	230	26.0462	6.771
G7YNX9	Innexin	plasma membrane	1.65269	24.29	1	1	9	9	457	52.282	7.89893
G7YUJ0	Nesprin-1 (Fragment)	plasma membrane	1.63876	20.66	1	1	63	90	4120	469.324	6.69775
H2KPP8	Protocadherin gamma-A3	plasma membrane	0	11.13	1	1	8	9	1249	139.3	5.77002
H2KNS4	T-cell immunomodulatory protein	plasma membrane	0	15.55	1	1	7	12	894	97.9325	5.42725
G7YT21	Netrin receptor DCC	plasma membrane	0	19.49	1	1	16	19	1570	172.366	7.28369
G7YS77	Lysosome-associated membrane glycoprotein	plasma membrane	0	15.28	1	1	4	4	288	31.7701	6.53662
G7YUU9	Chaperonin GroEL	plasma membrane	0	33.3	1	1	27	31	1066	117.044	9.11475
G7YPF4	ATP-binding cassette sub-family B member 6 mitochondrial	plasma membrane	0	19.84	1	1	8	9	640	71.6811	6.37939
G7YFS9	Anosmin-1	plasma membrane	0	11.45	1	1	6	8	821	92.7757	8.04541
G7YWC3	Centrosomal protein of 120 kDa	plasma membrane	0	21.96	1	1	16	22	1284	145.573	7.92822
